# Supplementary material for: Spatio-temporal analysis of coding and long noncoding transcripts during maize endosperm development
Source: PubMed Central journal article supplement (PMC5476630; doi:10.1038/s41598-017-03878-4), 2017-06-19
Supplement: 41598_2017_3878_MOESM1_ESM.pdf [file 41598_2017_3878_MOESM1_ESM.pdf]

## **Supplementary Information**

### **“Spatio-temporal analysis of coding and long noncoding transcripts during maize endosperm development”**

Eun-Deok Kim, Yuqing Xiong, Youngjae Pyo, Dong-Hwan Kim, Byung-Ho Kang, and Sibusung Sung

Supplementary Tables S1 ~ S3  
Supplementary Figures S1 ~ S8

**Table S1.** Summary of alignment of RNA-seq reads to maize B73 genome.

|               | <b>Total Reads</b> | <b>Mapped Reads</b> | <b>Fraction<br/>Tophat(%)</b> | <b>Fraction<br/>BWA(%)</b> |
|---------------|--------------------|---------------------|-------------------------------|----------------------------|
| <b>AL08</b>   | 20,930,227         | 16,892,600          | 80                            | 81                         |
| <b>AL12</b>   | 20,100,056         | 16,665,972          | 76                            | 83                         |
| <b>AL16</b>   | 19,183,803         | 17,237,607          | 82                            | 90                         |
| <b>SE08</b>   | 20,117,161         | 17,249,451          | 78                            | 86                         |
| <b>SE12</b>   | 20,248,540         | 17,852,491          | 82                            | 88                         |
| <b>SE16</b>   | 20,461,456         | 17,859,064          | 80                            | 87                         |
| <b>BETL08</b> | 22,881,396         | 19,915,567          | 81                            | 87                         |
| <b>BETL12</b> | 20,257,413         | 15,961,406          | 72                            | 79                         |
| <b>BETL16</b> | 18,761,116         | 16,415,752          | 80                            | 87                         |

ZmB73\_RefGen\_v2.tar.gz 2010  
ZmB73\_5b\_FGS.gff.gz 07-Feb-2011

**Table S2.** Summary of identified novel transcripts.

|               | <b>Total number of Novel transcripts</b> | <b>Total number of novel noncoding transcripts</b> |
|---------------|------------------------------------------|----------------------------------------------------|
| <b>BETL08</b> | 2693                                     | 1221                                               |
| <b>BETL12</b> | 5475                                     | 2710                                               |
| <b>BETL16</b> | 3752                                     | 1866                                               |
| <b>AL08</b>   | 1435                                     | 652                                                |
| <b>AL12</b>   | 2734                                     | 1263                                               |
| <b>AL16</b>   | 1152                                     | 566                                                |
| <b>SE08</b>   | 1113                                     | 992                                                |
| <b>SE12</b>   | 3317                                     | 1519                                               |
| <b>SE16</b>   | 1403                                     | 710                                                |

**Table S3.** Primer sequences used in this study

| Name                 | Sequence                      |           | Purpose   |
|----------------------|-------------------------------|-----------|-----------|
| GRMZM2G014729-real-F | GACGAGCACAACAGCAAAG           |           | qRT-PCR   |
| GRMZM2G014729-real-R | GCTAGGTAGAGAGTAGAGAGTAGAG     |           | qRT-PCR   |
| GRMZM2G402156-real-F | AGTGGAACCTACAACCCAAATC        |           | qRT-PCR   |
| GRMZM2G402156-real-R | CTGGTGCTCTCTTGGTCAATAC        |           | qRT-PCR   |
| GRMZM2G115721-real-F | GATGAGCAGCTACACCAACA          |           | qRT-PCR   |
| GRMZM2G115721-real-R | TGGACCTCCTCGAACTACAT          |           | qRT-PCR   |
| GRMZM2G107302-real-F | TCAAGTGTTTCGTCGCTGTC          |           | qRT-PCR   |
| GRMZM2G107302-real-R | GAAACGGTTGCAGTCGTAATTC        |           | qRT-PCR   |
| lncRNA2653-real-F    | CGCATCGCTCAGAGAAAGAA          |           | qRT-PCR   |
| lncRNA2653-real-R    | ACTGCCAGAAGAACAACACTACAA      |           | qRT-PCR   |
| GRMZM2G016145-real-F | TGC ACT GAT GTC ATA CCA GAA A | Orphan123 | qRT-PCR   |
| GRMZM2G016145-real-R | ATA CGA GGC ACG TCA GAA AC    |           | qRT-PCR   |
| GRMZM2G444748-real-F | GATGCGCCAGCATCTCTC            | ZIP60     | qRT-PCR   |
| GRMZM2G444748-real-R | GGTGGCTAGCTAGTGTAGGT          |           | qRT-PCR   |
| GRMZM2G402156-real-F | AGTGGAACCTACAACCCAAATC        | MYBR19    | qRT-PCR   |
| GRMZM2G402156-real-R | CTGGTGCTCTCTTGGTCAATAC        |           | qRT-PCR   |
| GRMZM2G089949-real-F | GACTTCGTACCTGAAGCCTATC        | DOF6      | qRT-PCR   |
| GRMZM2G089949-real-R | GCTCTCTGTTGTCCTTTCCA          |           | qRT-PCR   |
| GRMZM2G104866-real-F | GGCGATAACTTCACCGACTAC         | EREB203   | qRT-PCR   |
| GRMZM2G104866-real-R | CGACTTGGAGCAGCACAT            |           | qRT-PCR   |
| GRMZM2G041996-real-F | GGGACGACATCAAGGTCATAG         |           | qRT-PCR   |
| GRMZM2G041996-real-R | GTGGTGGTGGTGGTGAAG            |           | qRT-PCR   |
| GRMZM2G098892-real-F | AGTGAATCTGCTGAGAGAGAAATAG     |           | qRT-PCR   |
| GRMZM2G098892-real-R | CACGTCTGTGCTACTGATGAA         |           | qRT-PCR   |
| lncRNA1899-real-F    | GCATCGTCTCTTTCCGGTGTA         |           | qRT-PCR   |
| lncRNA1899-real-R    | GAGCAAGACCAAGGTGAAC           |           | qRT-PCR   |
| lncRNA5634-real-F    | GATGAACCATGATTGTGGTAATGA      |           | qRT-PCR   |
| lncRNA5634-real-R    | GGGACATGAAACAAAGGTGAC         |           | qRT-PCR   |
| TXN_ChIP_F           | GCCACGACTCTTCCAGTTT           |           | ChIP-qPCR |
| TXN_ChIP_R           | TCGGTCAGATCAACACCAATC         |           | ChIP-qPCR |
| GRMZM2G042582-F      | ACCATCCGATCCGGTAGTATC         |           | ChIP-qPCR |
| GRMZM2G042582-R      | GCTGGATTCCGGTATGTGTGT         |           | ChIP-qPCR |
| ZM2G014729_ProF      | GCAGATTTAACGGCGGATATTT        |           | ChIP-qPCR |
| ZM2G014729_ProR      | TCTATCTAGTGCCATTGAAGAAT       |           | ChIP-qPCR |
| ZM2G402156_ProF      | ATAAAGCACCGCAATCATGAAA        |           | ChIP-qPCR |
| ZM2G402156_ProR      | TGTGGACACCCACATATGTATC        |           | ChIP-qPCR |
| ZM2G115721_proF 2    | GGCTACTCAAAGCCAGACAT          |           | ChIP-qPCR |
| ZM2G115721_proR 2    | AGCCACTACACTACAAAGATACAC      |           | ChIP-qPCR |
| ZM2g107302-BodyF     | CGCCATCAGGACGACAG             |           | ChIP-qPCR |

|                   |                            |  |           |
|-------------------|----------------------------|--|-----------|
| ZM2g107302-BodyR  | CATGTGCATGAGATAGATATATGTGG |  | ChIP-qPCR |
| CUFF.2653 Right F | ACCTTCTATCGTATCGCAAGTAAA   |  | ChIP-qPCR |
| CUFF.2653 Right R | TGAAAGGGAAAGAAGTGGAGAG     |  | ChIP-qPCR |

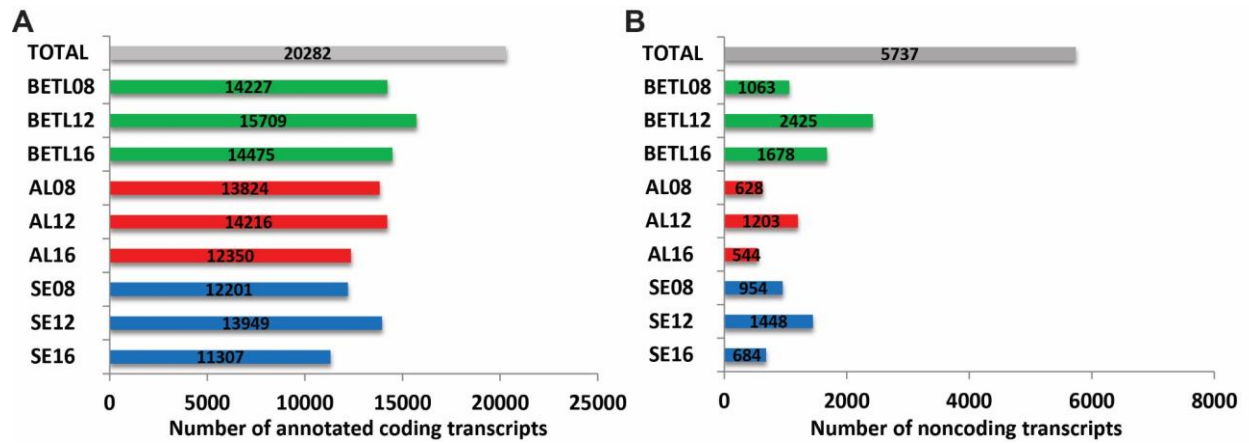

**Figure S1.** Transcriptome dynamics during the maize endosperm differentiation and development. **(A)** The number of annotated coding transcripts represented in each of the nine RNA-Seq data sets (FPKM>1). **(B)** The number of identified long noncoding transcripts represented in each of the nine RNA-Seq data sets.

### A Spatially regulated Transcription Factors

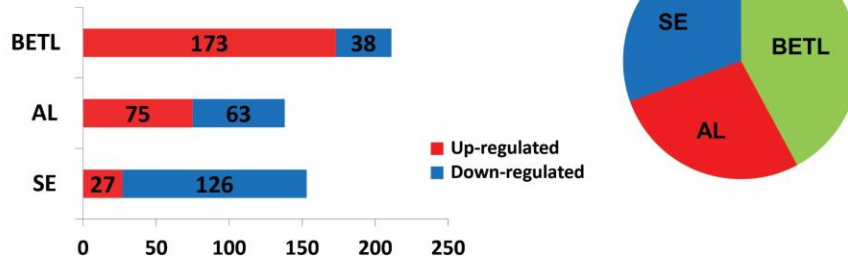

### B Temporally regulated Transcription Factors

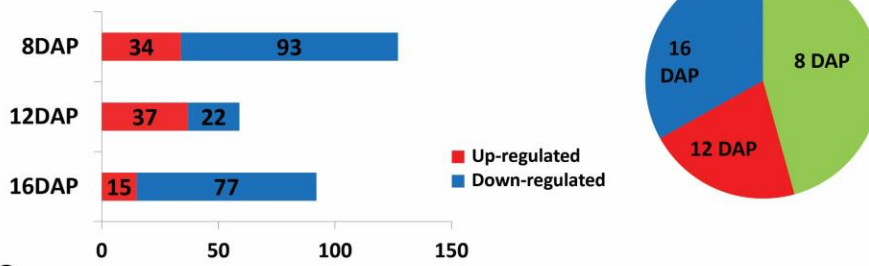

### C

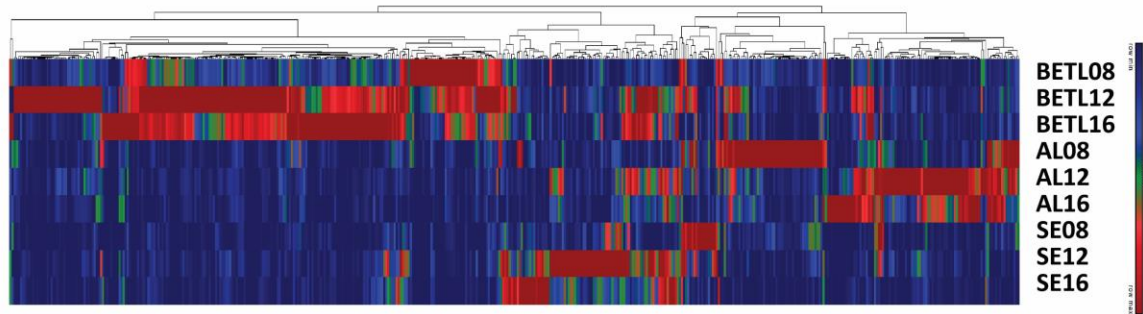

### D

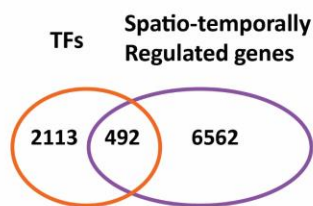

### E

|                      | BETL     | AL       | SE        |
|----------------------|----------|----------|-----------|
| Transcription factor | 7.9E-05. | 0.868281 | 0.745209. |
|                      | 8DAP     | 12DAP    | 16DAP     |
| Transcription factor | 0.756389 | 0.18095  | 0.094654  |

### F

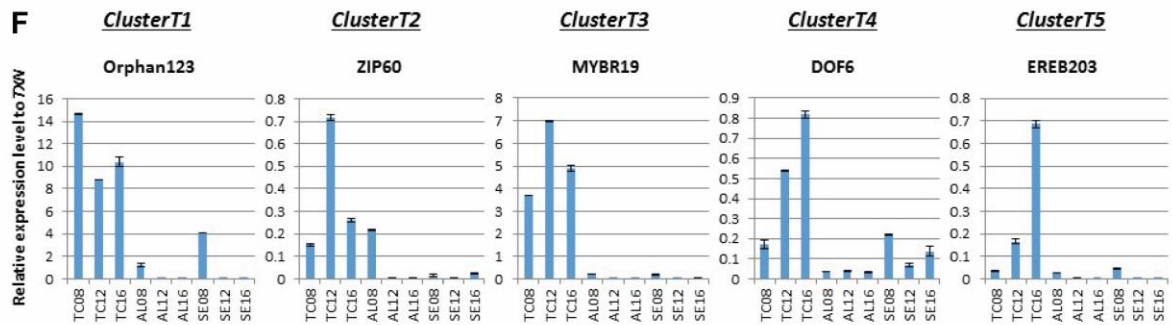

**Figure S2.** Spatio-temporally regulated Transcription Factors. **(A)** The number of Transcription factor that are up- or down-regulated more than 4-fold at any tissue is shown in box graphs. **(B)** The number of Transcription factor that are up- or down-regulated more than 4 fold at any DAP is shown in box graphs. **(C)** Hierarchical cluster analysis of spatiotemporally regulated Transcription factors. **(D)** Venn diagram of the number of overlapping transcription factor genes and spatiotemporally regulated genes during maize endosperm development. **(E)** Statistical measure of biological significance for overlapping genomic region of transcription factor genes by Chi-square test. **(F)** Validation of the expression of spatiotemporally regulated Transcription Factors. Orphan123 (GRMZM2G016145) bZIP60 (GRMZM2G444748) MYBR19 (GRMZM2G402156) DOF6 (GRMZM2G089949), and EREB203 (GRMZM2G104866) were tested using qRT-PCR analysis. Y-axis represents the relative expression level to *TXN* (GRMZM2G066612) and X-axis indicates 9 samples: BETL08, BETL12, BETL16, AL08, AL12, AL16, SE08, SE12, and SE16 from left to right.



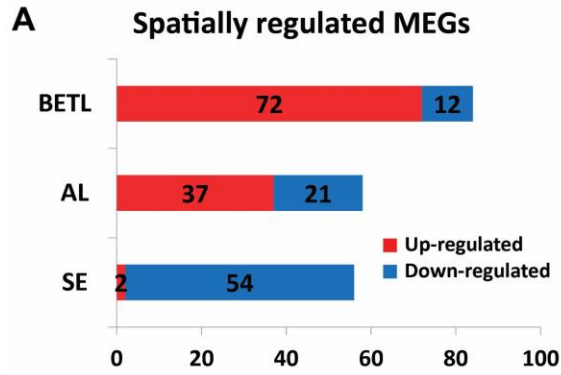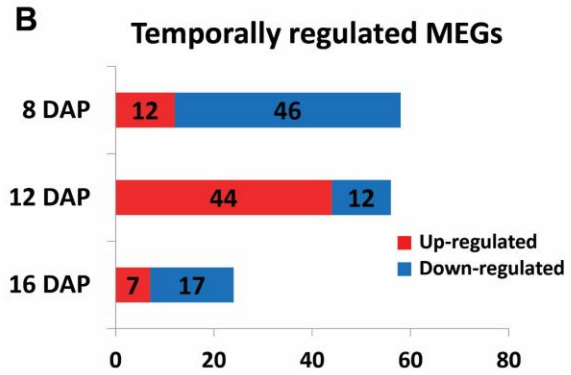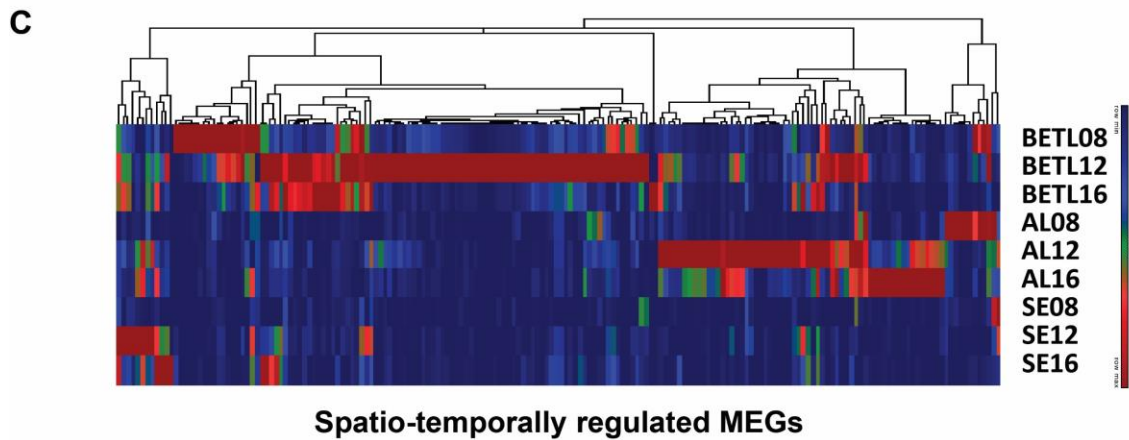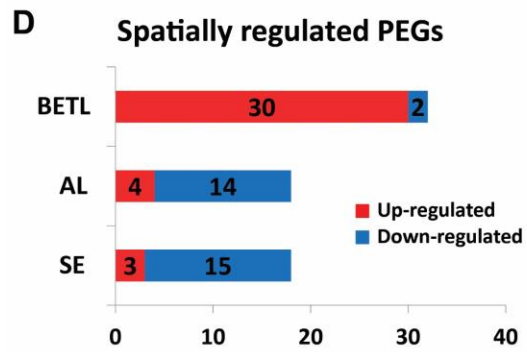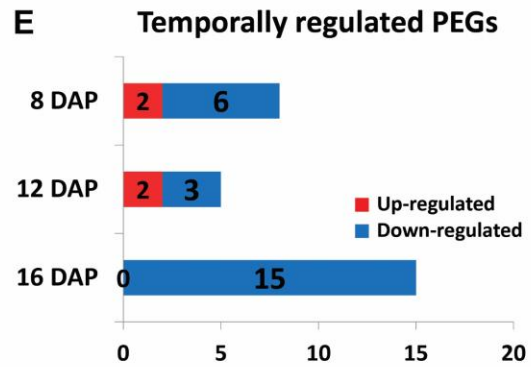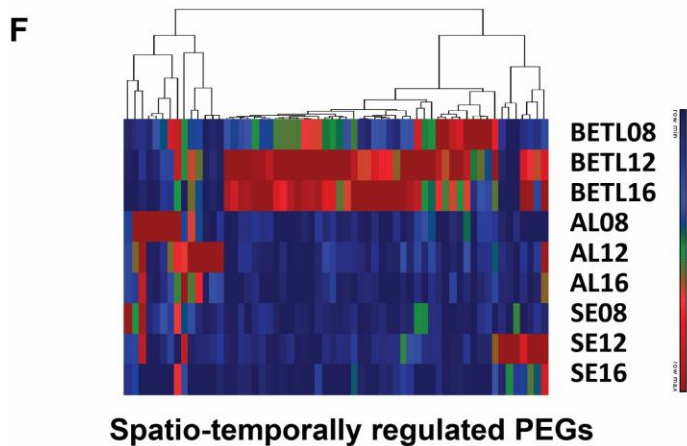

**Figure S3.** Spatio-temporally regulated MEGs and PEGs. **(A)** The number of MEGs that were up- or down-regulated more than 4-fold in any one tissue was shown in box graphs. **(B)** The number of MEGs that were up- or down-regulated more than 4 fold at any DAP is shown in box graphs. **(C)** Hierarchical cluster analysis of spatiotemporally regulated MEGs. **(D)** The number of PEGs that were up- or down-regulated more than 4-fold at any tissue is shown in box graphs. **(E)** The number of PEGs that were up- or down-regulated more than 4 fold at any DAP is shown in box graphs. **(F)** Hierarchical cluster analysis of spatiotemporally regulated PEGs.

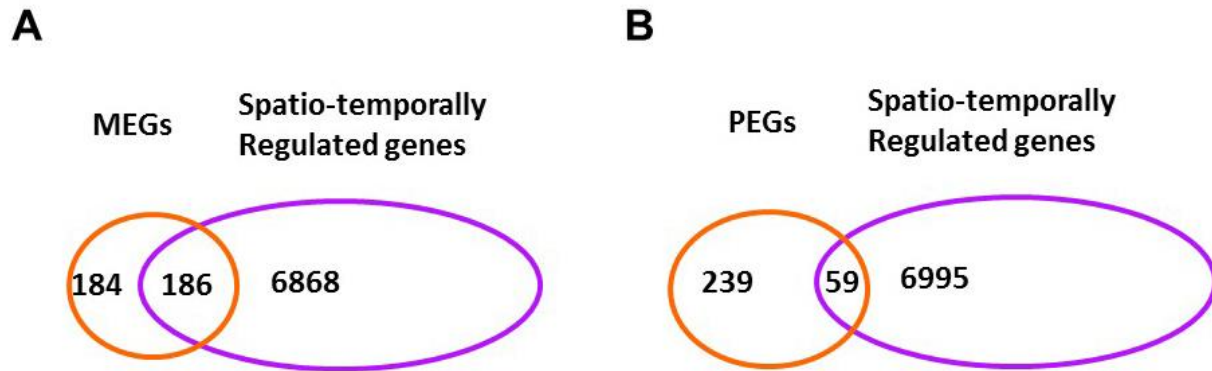

**Figure S4.** Significant overlapping between MEGs/PEGs and spatio-temporally regulated genes. **(A)** Venn diagram of the number of genes overlapping between MEGs and spatio-temporally regulated genes during maize endosperm development. Statistical significance were measured by Chi-square test. **(B)** Venn diagram of the number of genes overlapping between PEGs and spatio-temporally regulated genes during maize endosperm development. Statistical significance were measured by Chi-square test.

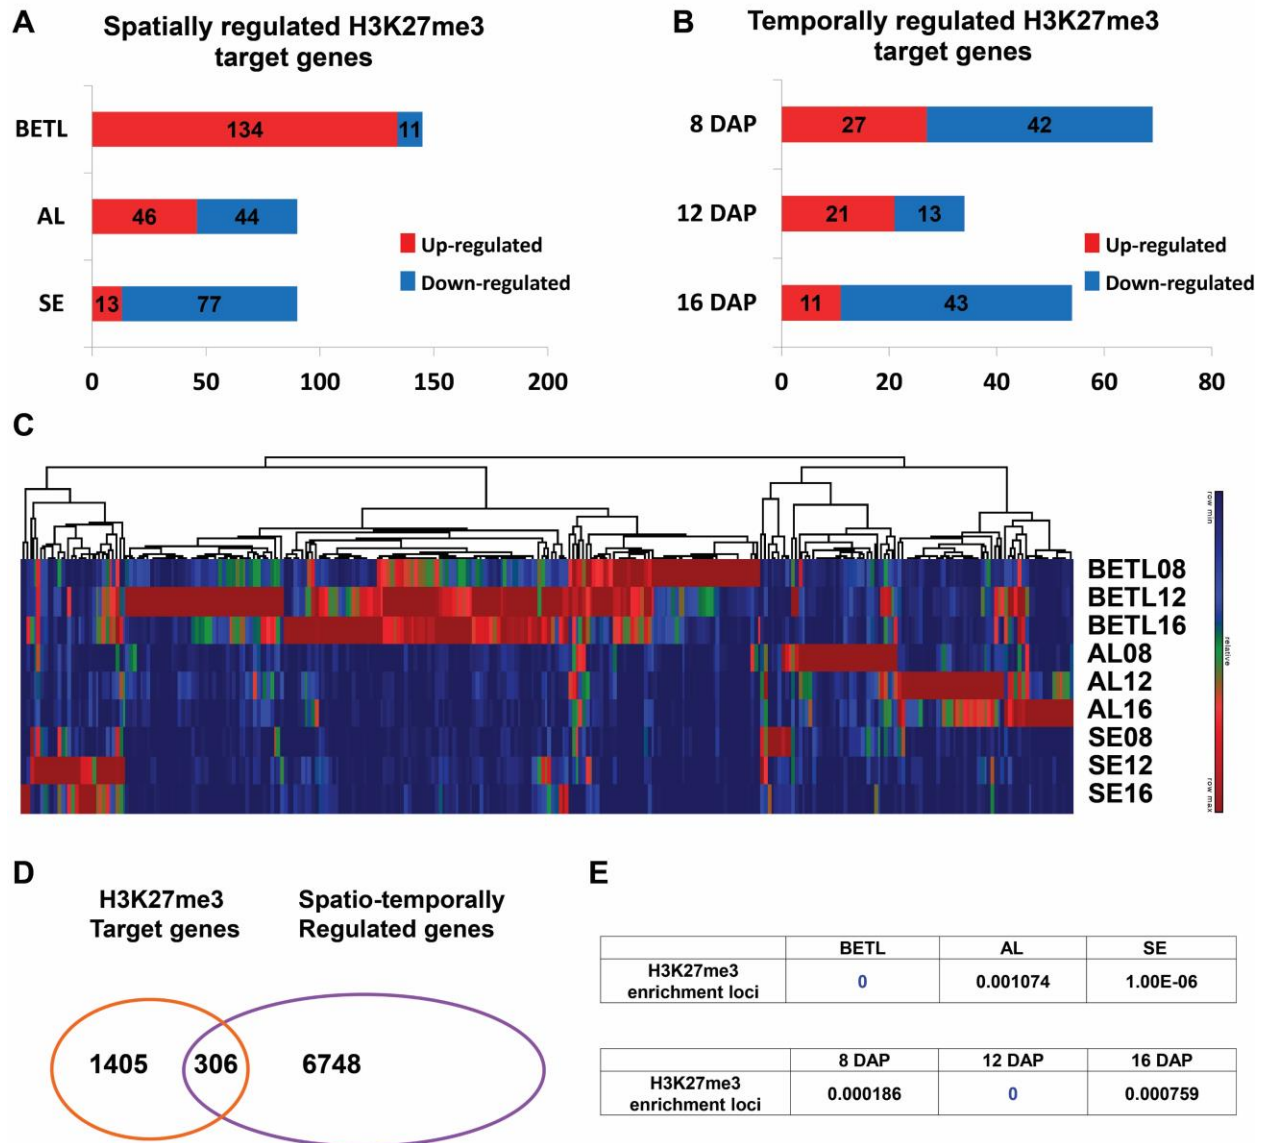

**Figure S5.** Spatio-temporally regulated H3K27me3 target coding loci. **(A)** The number of H3K27me3-enriched loci that were up- or down-regulated more than 4-fold at any tissue is shown in box graphs. **(B)** The number of H3K27me3-enriched loci that were up- or down-regulated more than 4 fold at any DAP is shown in box graphs. **(C)** Hierarchical cluster analysis of spatiotemporally regulated H3K27me3 target genes. **(D)** Venn diagrams to show the overlaps between H3K27me3-enriched loci and spatiotemporally regulated genes during endosperm development.

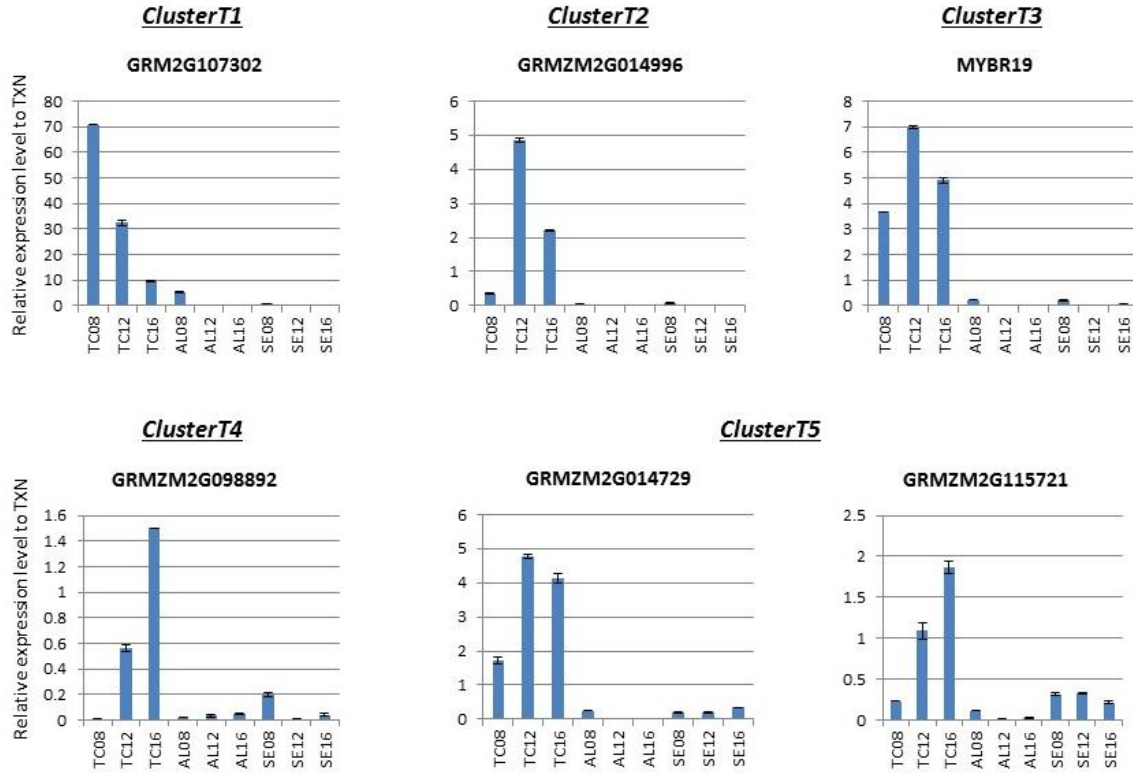

**Figure S6.** Validation of the expression of spatiotemporally regulated H3K27me3 target genes. Validation of the expression of spatiotemporally regulated H3K27me3 target genes. The six genes were tested using qRT-PCR analysis. Y-axis represents the relative expression level to *TXN* and X-axis indicates 9 samples: BETL08, BETL12, BETL16, AL08, AL12, AL16, SE08, SE12, and SE16 from left to right.

|                          | BETL | AL       | SE       |
|--------------------------|------|----------|----------|
| H3K27me3 enrichment loci | 0    | 0.001074 | 1.00E-06 |

|                          | 8 DAP    | 12 DAP | 16 DAP   |
|--------------------------|----------|--------|----------|
| H3K27me3 enrichment loci | 0.000186 | 0      | 0.000759 |

**Figure S7.** Statistical significance of the overlap between spatio-temporally regulated lncRNAs and H3K27me3-enriched loci. Chi-square test to address the significance of over-representation of H3K27me3-enriched loci in spatiotemporally regulated lncRNAs.

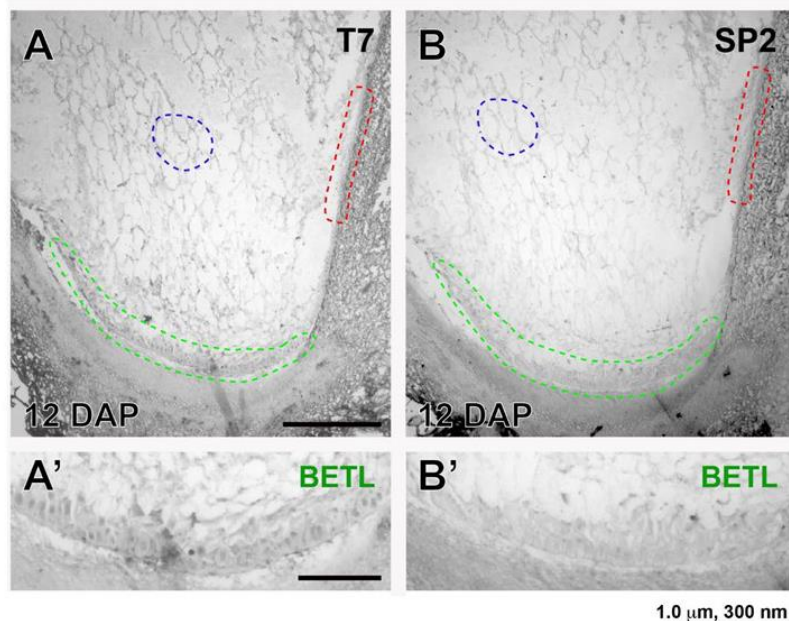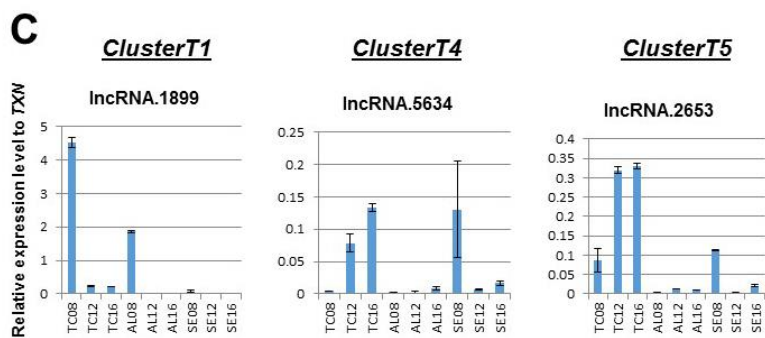

**Figure S8.** Validation of the expression of spatio-temporally regulated IncRNAs. (A) *in situ* hybridization of IncRNA.2653 (B) Three IncRNAs were tested using qRT-PCR analysis. Y-axis represents the relative expression level to *TXN* (GRMZM2G066612) and X-axis indicates 9 samples: BETL08, BETL12, BETL16, AL08, AL12, AL16, SE08, SE12, and SE16 from left to right.
